# Supplementary material for: Electrical stimulation of the splenic nerve bundle ameliorates dextran sulfate sodium-induced colitis in mice
Source: Springer Nature journal article supplement (doi:10.1186/s12974-022-02504-z), 2022-06-17

**A**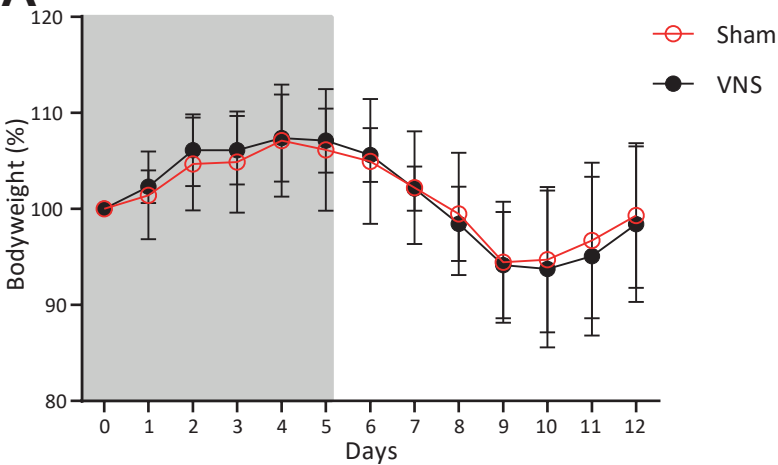**B**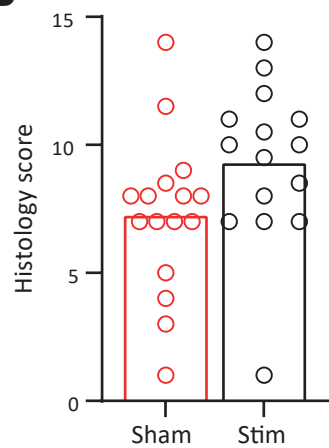**C**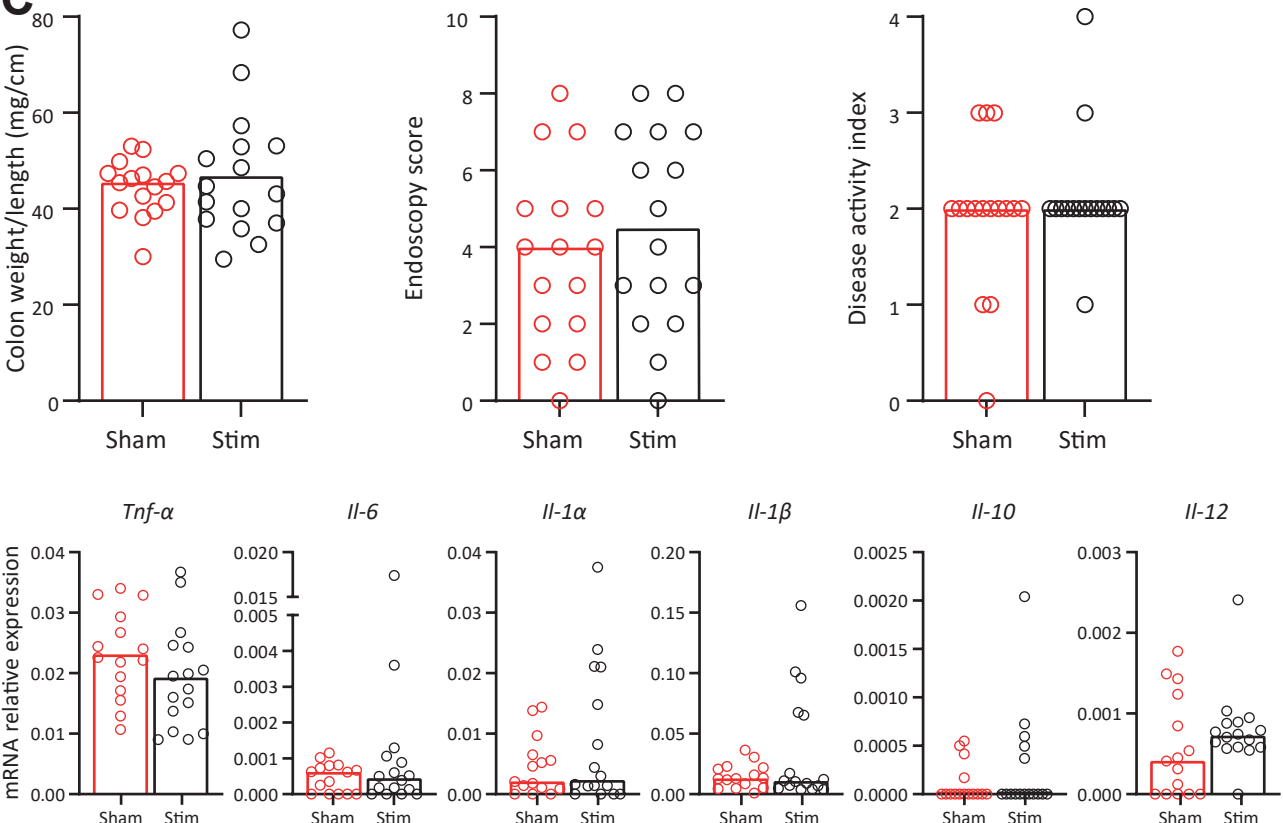

Supplement: MOESM2 [file 23177384]
