# Supplementary material for: Electrical stimulation of the splenic nerve bundle ameliorates dextran sulfate sodium-induced colitis in mice
Source: Springer Nature journal article supplement (doi:10.1186/s12974-022-02504-z), 2022-06-17
Supplement: MOESM5 [file 23177384]

# Colon: DSS-Sham vs Control

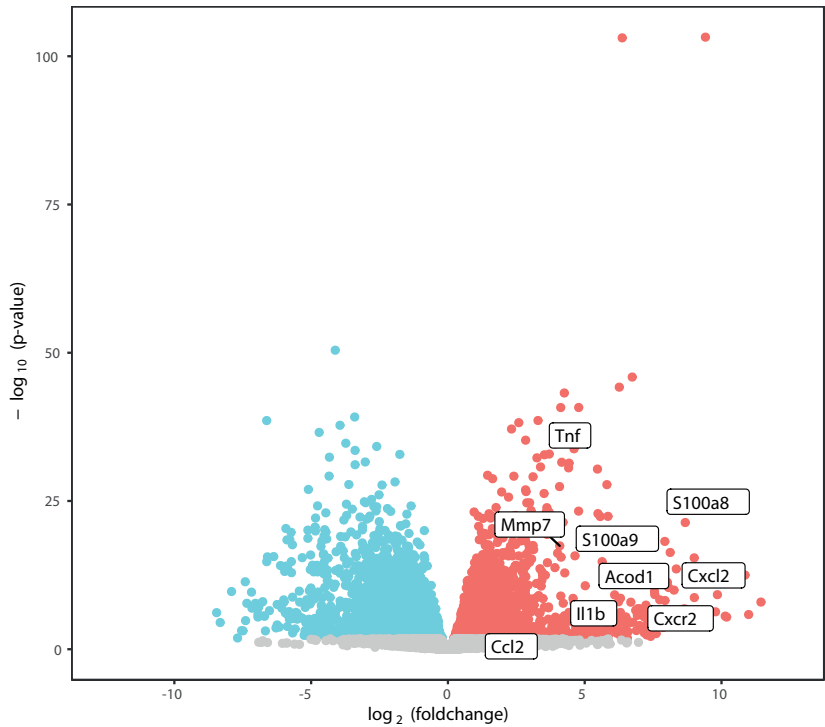

● Downregulated    ● Non-significant    ● Upregulated
